# Supplementary material for: Antidiabetic Effects of Gegen Qinlian Decoction via the Gut Microbiota Are Attributable to Its Key Ingredient Berberine
Source: PubMed Central journal article supplement (PMC8377040; doi:10.1016/j.gpb.2019.09.007), 2020-12-24

**A**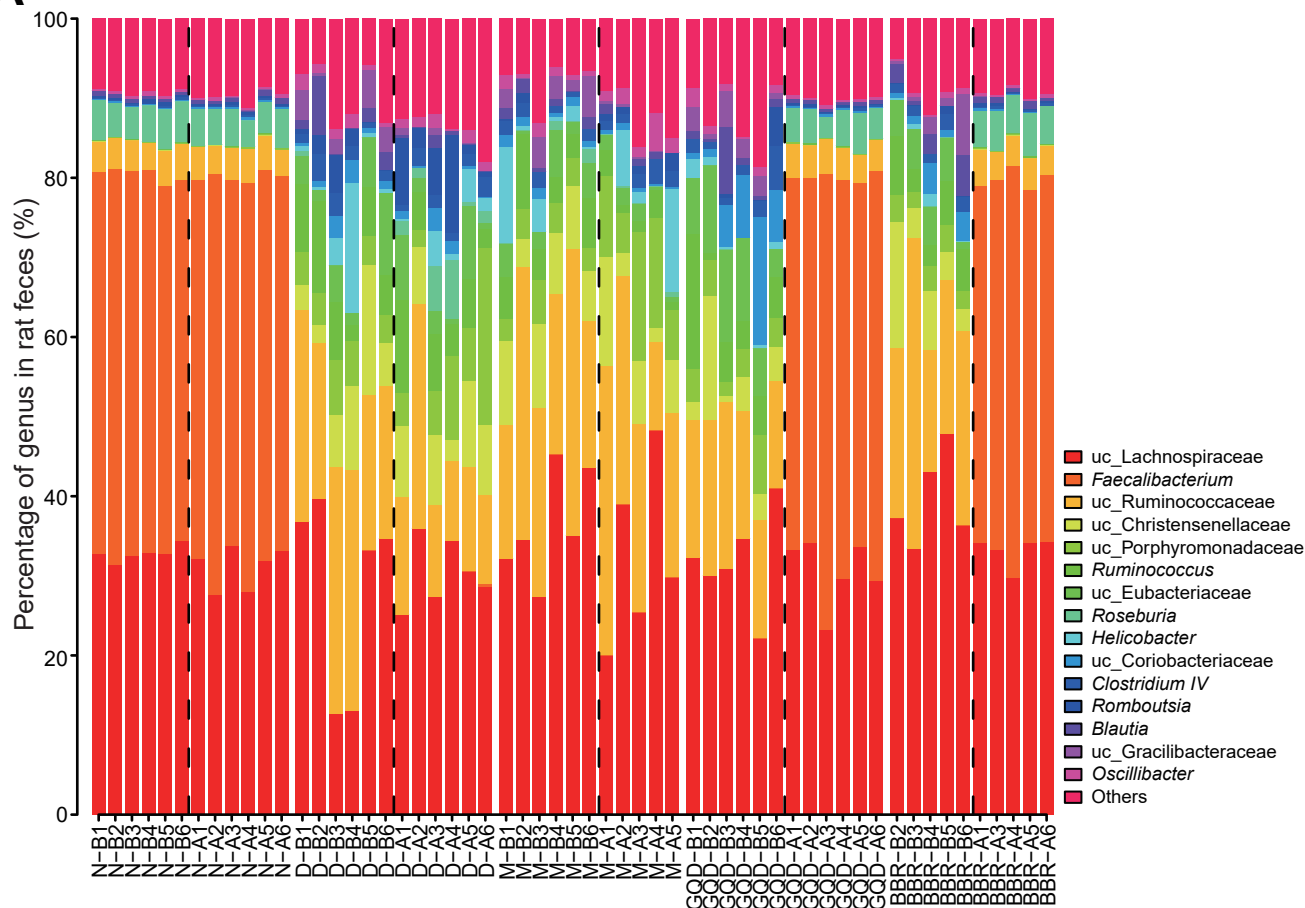**B**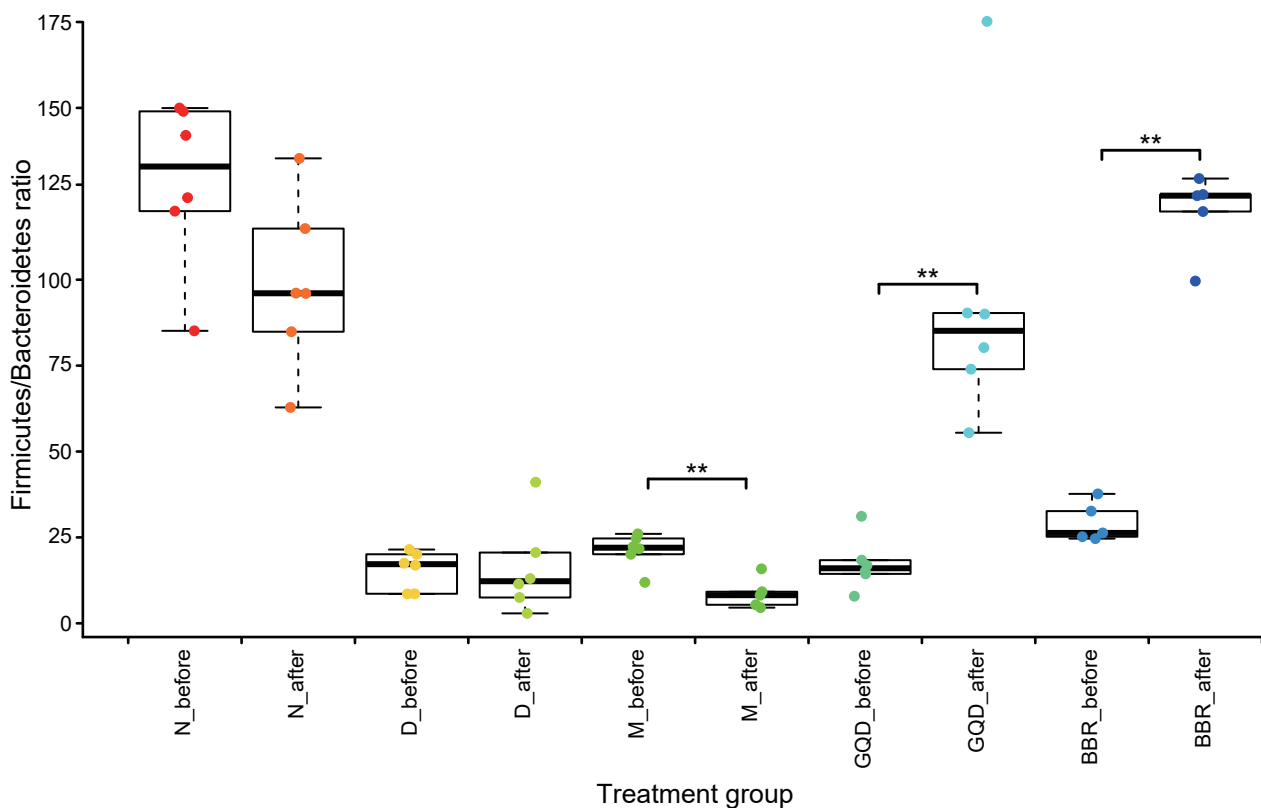

Supplement: mmc1.pdf [file mmc1.pdf]
