# Supplementary material for: Antidiabetic Effects of Gegen Qinlian Decoction via the Gut Microbiota Are Attributable to Its Key Ingredient Berberine
Source: PubMed Central journal article supplement (PMC8377040; doi:10.1016/j.gpb.2019.09.007), 2020-12-24

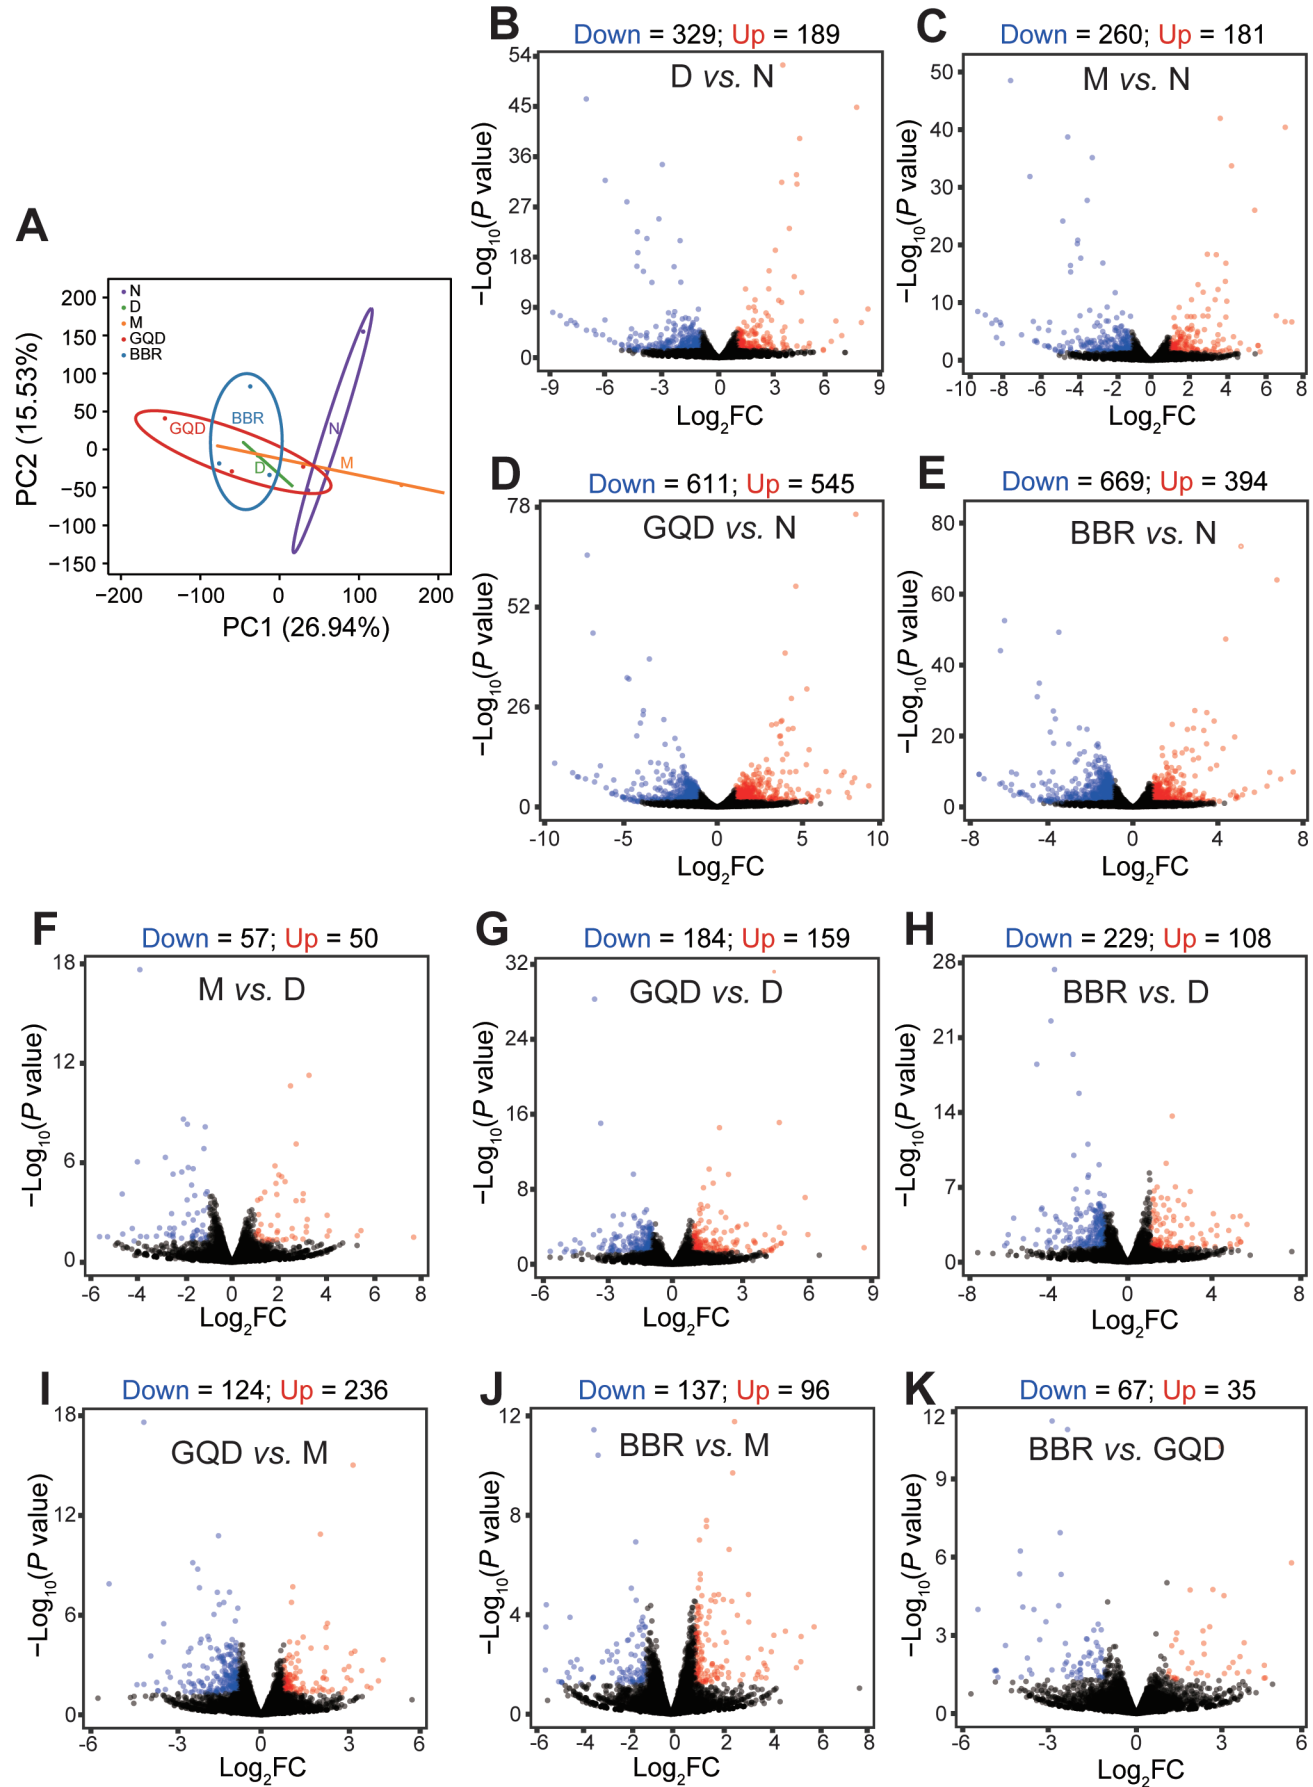

Supplement: mmc3.pdf [file mmc3.pdf]
