# Supplementary material for: Antidiabetic Effects of Gegen Qinlian Decoction via the Gut Microbiota Are Attributable to Its Key Ingredient Berberine
Source: PubMed Central journal article supplement (PMC8377040; doi:10.1016/j.gpb.2019.09.007), 2020-12-24

## A Enriched GO terms

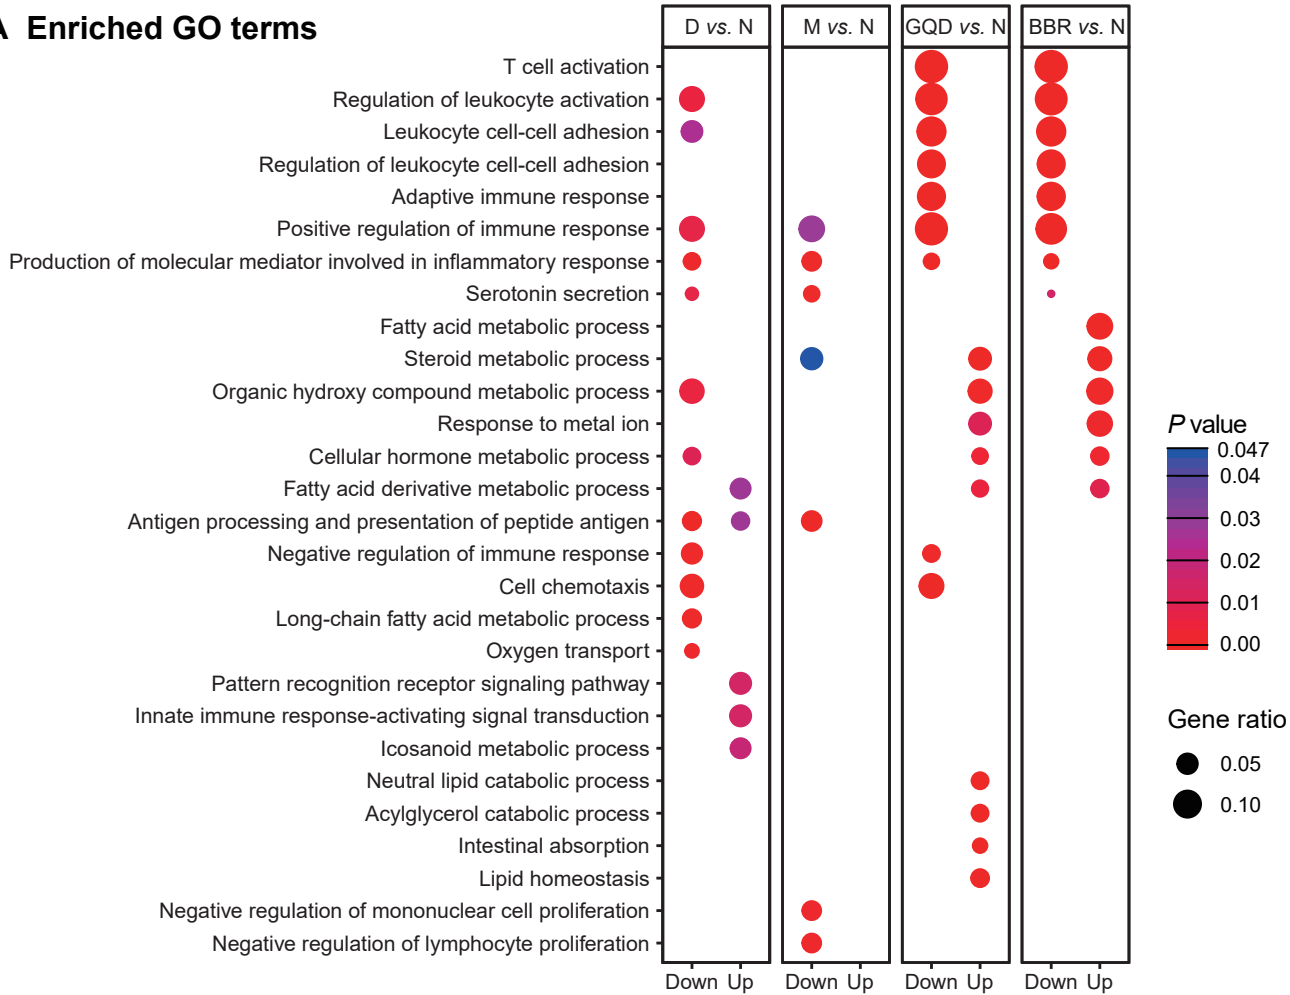

## B Enriched KEGG pathways

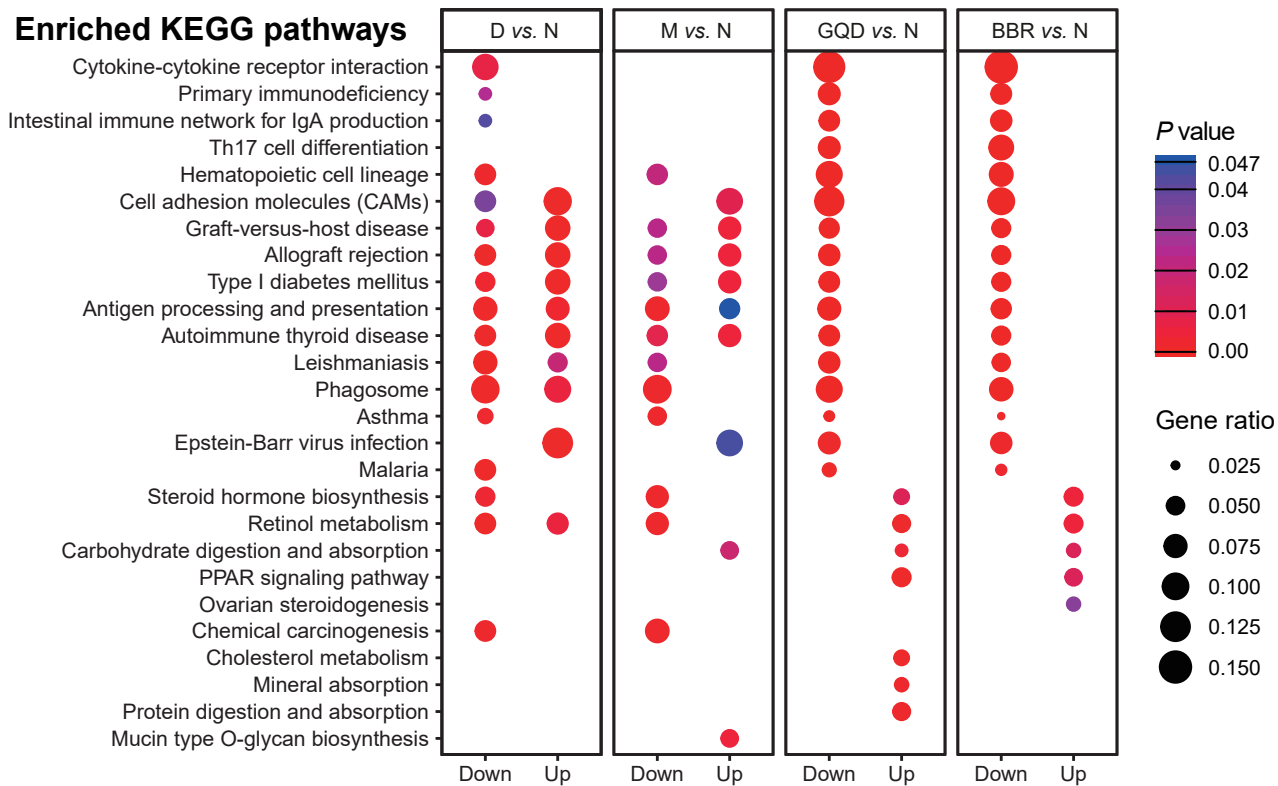

Supplement: mmc4.pdf [file mmc4.pdf]
