# Supplementary material for: Antidiabetic Effects of Gegen Qinlian Decoction via the Gut Microbiota Are Attributable to Its Key Ingredient Berberine
Source: PubMed Central journal article supplement (PMC8377040; doi:10.1016/j.gpb.2019.09.007), 2020-12-24

### A Enriched KEGG cell signaling pathways

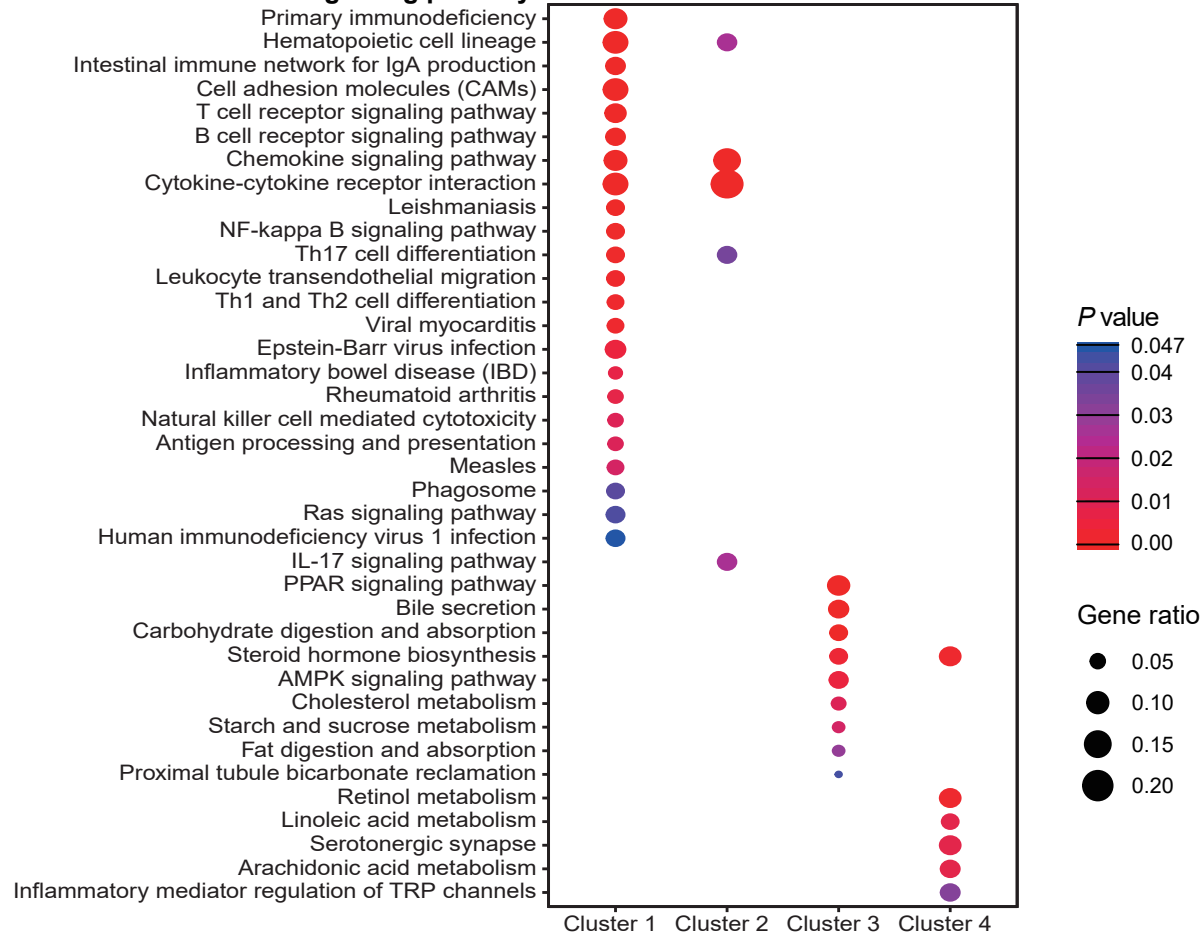

### B Enriched KEGG metabolic pathways

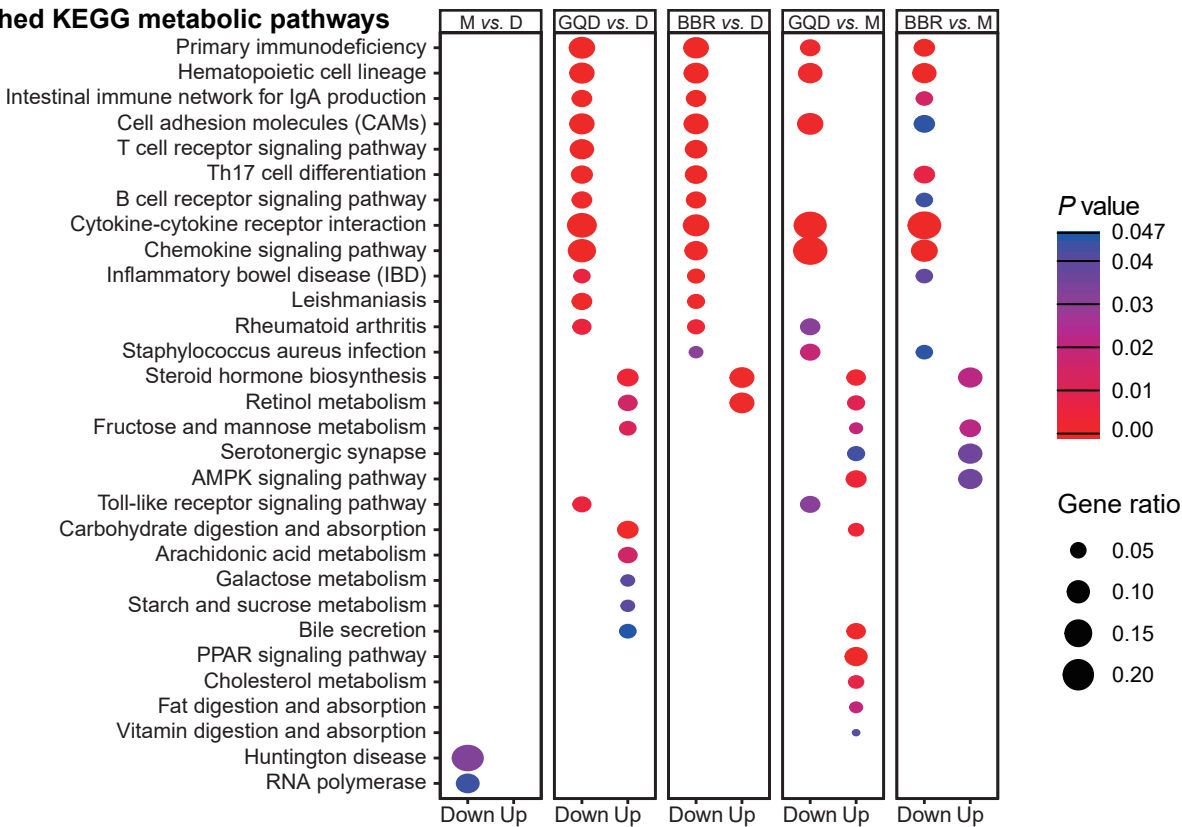

Supplement: mmc5.pdf [file mmc5.pdf]
